CORRECTION

# Correction: The ATP Receptors P2X7 and P2X4 Modulate High Glucose and Palmitate-Induced Inflammatory Responses in Endothelial Cells

Ramasri Sathanoori, Karl Swärd, Björn Olde, David Erlinge

There is an error in panel B of [Fig 4](#). Please view [Fig 4](#) here.

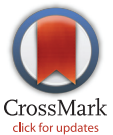

## OPEN ACCESS

**Citation:** Sathanoori R, Swärd K, Olde B, Erlinge D (2015) Correction: The ATP Receptors P2X7 and P2X4 Modulate High Glucose and Palmitate-Induced Inflammatory Responses in Endothelial Cells. PLoS ONE 10(7): e0133346. doi:10.1371/journal.pone.0133346

**Published:** July 17, 2015

**Copyright:** © 2015 Sathanoori et al. This is an open access article distributed under the terms of the [Creative Commons Attribution License](#), which permits unrestricted use, distribution, and reproduction in any medium, provided the original author and source are credited.

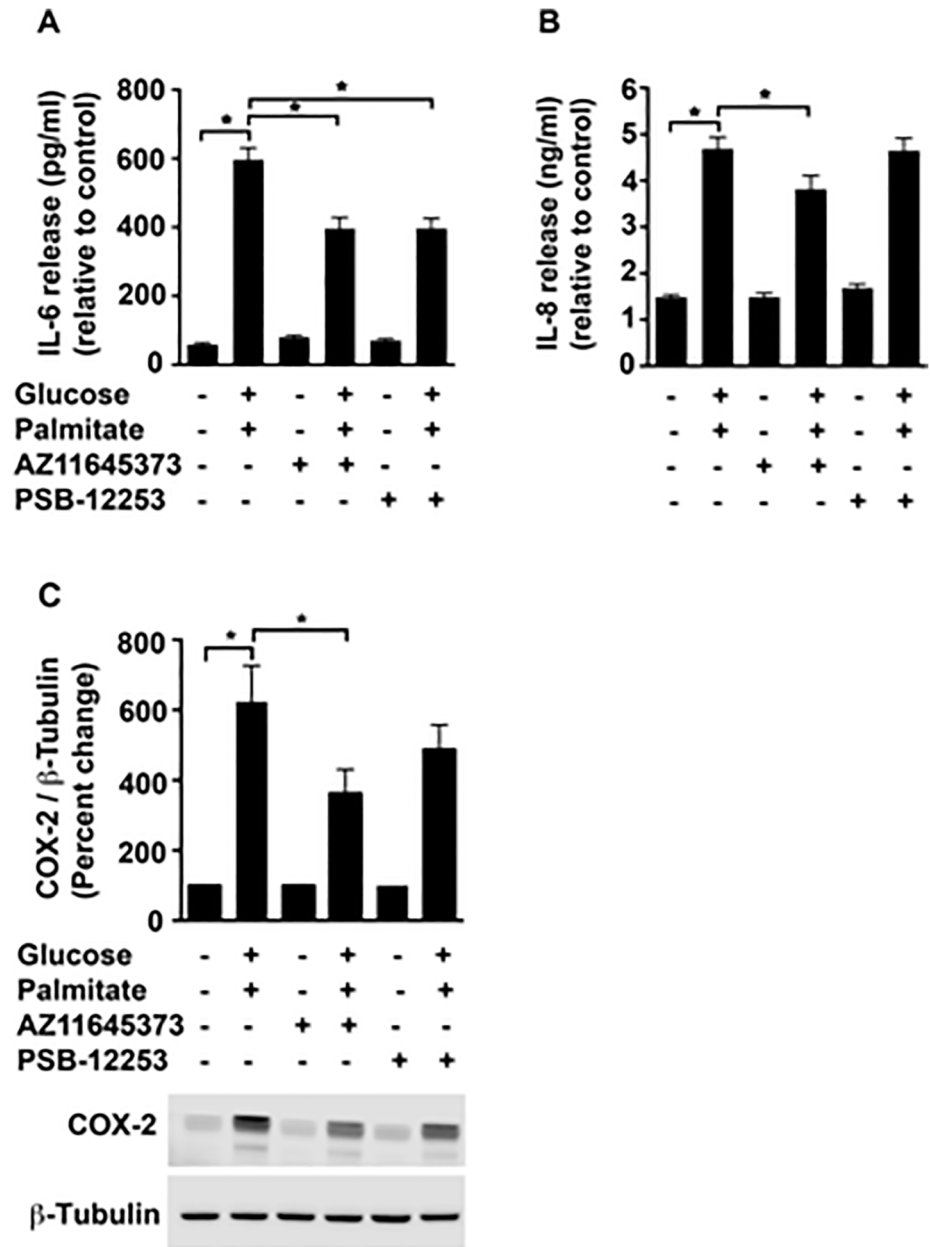

**Fig 4. Purinergic modulation of high glucose and palmitate-induced IL-6, IL-8 and COX-2 protein.** HUVECs were exposed to high glucose and palmitate (48 h) in the presence or absence of the P2X7 and P2X4 antagonists. The supernatants were analyzed for IL-6 (A) and IL-8 (B) secretion using ELISA. Cell lysates probed for COX-2 (C; 74 kDa) and normalized to  $\beta$ -Tubulin are represented as percentage of control. A representative immunoblot for each protein is depicted.  $n = 3$  to 4 independent experiments each done in replicates;  $*p \leq 0.05$ .

doi:10.1371/journal.pone.0133346.g001

## Reference

1. Sathanoori R, Swärd K, Olde B, Erlinge D (2015) The ATP Receptors P2X7 and P2X4 Modulate High Glucose and Palmitate-Induced Inflammatory Responses in Endothelial Cells. PLoS ONE 10(5): e0125111. doi: [10.1371/journal.pone.0125111](https://doi.org/10.1371/journal.pone.0125111) PMID: [25938443](https://pubmed.ncbi.nlm.nih.gov/25938443/)
